# Supplementary material for: Serum PBDEs in a North Carolina Toddler Cohort: Associations with Handwipes, House Dust, and Socioeconomic Variables
Source: PubMed Central journal article supplement (PMC3404669; doi:10.1289/ehp.1104802), 2012-05-23
Supplement: ehp.1104802.s001.pdf [file ehp.1104802.s001.pdf]

## **Supplemental Information**

### **Serum PBDEs in a North Carolina Toddler Cohort: Associations with Hand Wipes, House Dust and Socioeconomic Variables**

Heather M. Stapleton\*<sup>1</sup>, Sarah Eagle<sup>1</sup>, Andreas Sjödin<sup>2</sup>, and Thomas F. Webster<sup>3</sup>

1. Nicholas School of the Environment, Duke University, Durham, NC, USA

2. Centers for Disease Control and Prevention (CDC), National Center for Environmental Health (NCEH), Division for Laboratory Sciences (DLS), Atlanta, GA, USA

3. Dept. Environmental Health, Boston University School of Public Health, Boston, MA, USA

Address correspondence to:

Heather Stapleton, PhD

Nicholas School of the Environment

Duke University

LSRC, Box 90328

Durham, NC 27708

Phone: 919-613-8717

Fax: 919-684-8741

Email: [heather.stapleton@duke.edu](mailto:heather.stapleton@duke.edu)

**Table S1. Pearson correlation coefficients for individual BDE congeners among serum, handwipes and dust.**

|                | Log Serum         |                     |                     |                     |                     | Log Handwipes       |                     |                     |                     |                     | Log House Dust      |                    |                    |                    |                    |                   |
|----------------|-------------------|---------------------|---------------------|---------------------|---------------------|---------------------|---------------------|---------------------|---------------------|---------------------|---------------------|--------------------|--------------------|--------------------|--------------------|-------------------|
|                |                   | BDE 47              | BDE 99              | BDE 100             | BDE 153             | ΣBDE <sub>3</sub>   | BDE 47              | BDE 99              | BDE 100             | BDE 153             | ΣBDE <sub>3</sub>   | BDE 47             | BDE 99             | BDE 100            | BDE 153            | ΣBDE <sub>3</sub> |
| Log Serum      | BDE47             | 1.000               |                     |                     |                     |                     |                     |                     |                     |                     |                     |                    |                    |                    |                    |                   |
|                | BDE99             | 0.938 <sup>#</sup>  | 1.000               |                     |                     |                     |                     |                     |                     |                     |                     |                    |                    |                    |                    |                   |
|                | BDE100            | 0.952 <sup>#</sup>  | 0.902 <sup>#</sup>  | 1.000               |                     |                     |                     |                     |                     |                     |                     |                    |                    |                    |                    |                   |
|                | BDE153            | 0.606 <sup>#</sup>  | 0.509 <sup>#</sup>  | 0.692 <sup>#</sup>  | 1.000               |                     |                     |                     |                     |                     |                     |                    |                    |                    |                    |                   |
|                | ΣBDE <sub>3</sub> | 0.997 <sup>#</sup>  | 0.960 <sup>#</sup>  | 0.962 <sup>#</sup>  | 0.609 <sup>#</sup>  | 1.000               |                     |                     |                     |                     |                     |                    |                    |                    |                    |                   |
| Log Handwipes  | BDE47             | 0.579 <sup>#</sup>  | 0.587 <sup>#</sup>  | 0.544 <sup>#</sup>  | 0.401 <sup>#</sup>  | 0.584 <sup>#</sup>  | 1.000               |                     |                     |                     |                     |                    |                    |                    |                    |                   |
|                | BDE99             | 0.541 <sup>#</sup>  | 0.596 <sup>#</sup>  | 0.505 <sup>#</sup>  | 0.305 <sup>**</sup> | 0.555 <sup>#</sup>  | 0.943 <sup>#</sup>  | 1.000               |                     |                     |                     |                    |                    |                    |                    |                   |
|                | BDE100            | 0.567 <sup>#</sup>  | 0.616 <sup>#</sup>  | 0.528 <sup>#</sup>  | 0.369 <sup>**</sup> | 0.580 <sup>#</sup>  | 0.949 <sup>#</sup>  | 0.962 <sup>#</sup>  | 1.000               |                     |                     |                    |                    |                    |                    |                   |
|                | BDE153            | 0.482 <sup>**</sup> | 0.587 <sup>#</sup>  | 0.480 <sup>**</sup> | 0.306 <sup>**</sup> | 0.510 <sup>#</sup>  | 0.818 <sup>#</sup>  | 0.857 <sup>#</sup>  | 0.859 <sup>#</sup>  | 1.000               |                     |                    |                    |                    |                    |                   |
|                | ΣBDE <sub>3</sub> | 0.579 <sup>#</sup>  | 0.608 <sup>#</sup>  | 0.542 <sup>#</sup>  | 0.370 <sup>**</sup> | 0.588 <sup>#</sup>  | 0.987 <sup>#</sup>  | 0.982 <sup>#</sup>  | 0.971 <sup>#</sup>  | 0.856 <sup>#</sup>  | 1.000               |                    |                    |                    |                    |                   |
| Log House Dust | BDE47             | 0.362 <sup>**</sup> | 0.301 <sup>**</sup> | 0.374 <sup>**</sup> | 0.256 <sup>*</sup>  | 0.354 <sup>**</sup> | 0.388 <sup>**</sup> | 0.360 <sup>**</sup> | 0.333 <sup>**</sup> | 0.382 <sup>**</sup> | 0.374 <sup>**</sup> | 1.000              |                    |                    |                    |                   |
|                | BDE99             | 0.314 <sup>**</sup> | 0.280 <sup>*</sup>  | 0.323 <sup>**</sup> | 0.197               | 0.310 <sup>**</sup> | 0.338 <sup>**</sup> | 0.319 <sup>**</sup> | 0.285 <sup>*</sup>  | 0.342 <sup>**</sup> | 0.330 <sup>**</sup> | 0.899 <sup>#</sup> | 1.000              |                    |                    |                   |
|                | BDE100            | 0.347 <sup>**</sup> | 0.300 <sup>*</sup>  | 0.357 <sup>**</sup> | 0.258 <sup>*</sup>  | 0.341 <sup>**</sup> | 0.348 <sup>**</sup> | 0.335 <sup>**</sup> | 0.300 <sup>**</sup> | 0.358 <sup>**</sup> | 0.340 <sup>**</sup> | 0.960 <sup>#</sup> | 0.909 <sup>#</sup> | 1.000              |                    |                   |
|                | BDE153            | 0.302 <sup>**</sup> | 0.285 <sup>*</sup>  | 0.312 <sup>**</sup> | 0.195               | 0.300 <sup>**</sup> | 0.301 <sup>**</sup> | 0.311 <sup>**</sup> | 0.267 <sup>*</sup>  | 0.338 <sup>**</sup> | 0.301 <sup>**</sup> | 0.912 <sup>#</sup> | 0.908 <sup>#</sup> | 0.945 <sup>#</sup> | 1.000              |                   |
|                | ΣBDE <sub>3</sub> | 0.342 <sup>**</sup> | 0.291 <sup>*</sup>  | 0.352 <sup>**</sup> | 0.227 <sup>*</sup>  | 0.335 <sup>**</sup> | 0.372 <sup>**</sup> | 0.347 <sup>**</sup> | 0.310 <sup>**</sup> | 0.375 <sup>**</sup> | 0.359 <sup>**</sup> | 0.981 <sup>#</sup> | 0.961 <sup>#</sup> | 0.966 <sup>#</sup> | 0.942 <sup>#</sup> | 1.000             |

\* p<0.05; \*\* p<0.01, # p<0.001
